# Supplementary material for: Influence of Selenium Biofortification on the Growth and Bioactive Metabolites of Ganoderma lucidum
Source: Foods. 2021 Aug 12;10(8):1860. doi: 10.3390/foods10081860 (PMC8391904; doi:10.3390/foods10081860)
Supplement: Supplementary file 1 [file foods-10-01860-s001.zip › foods-1296445-supplementary.pdf]

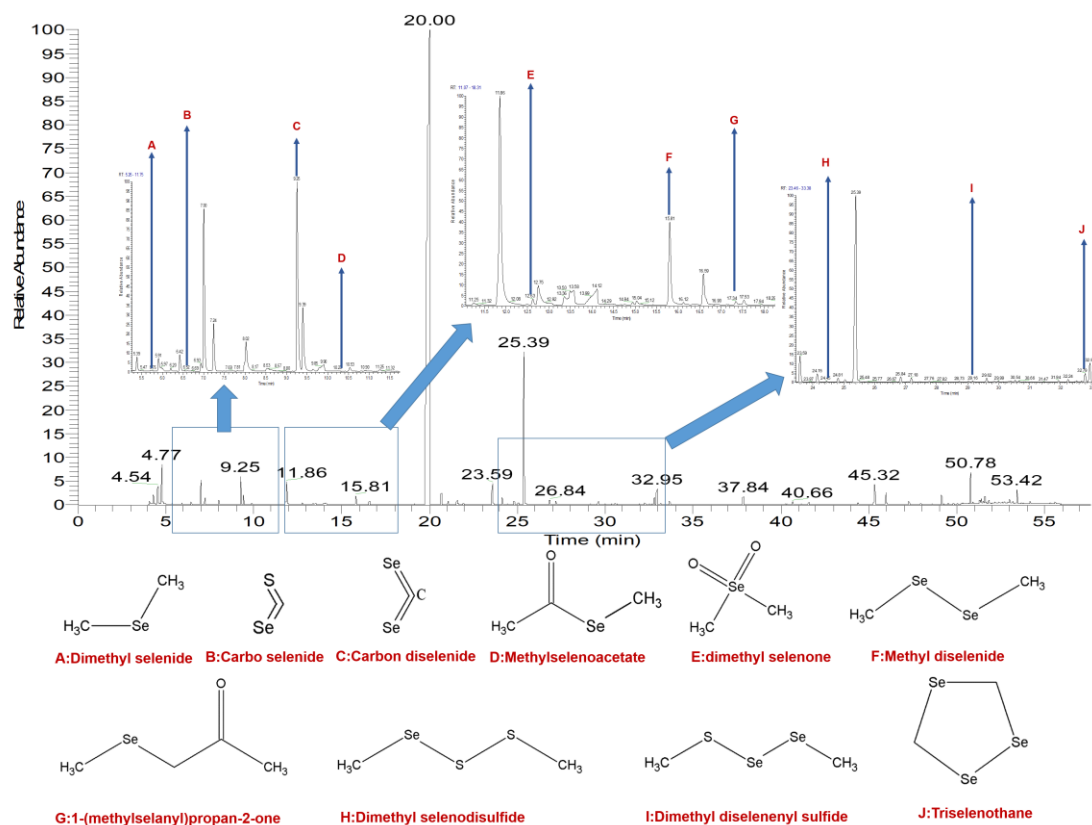

**Fig. S1** GC-MS total ion map and structures of the identified volatile Se-compounds

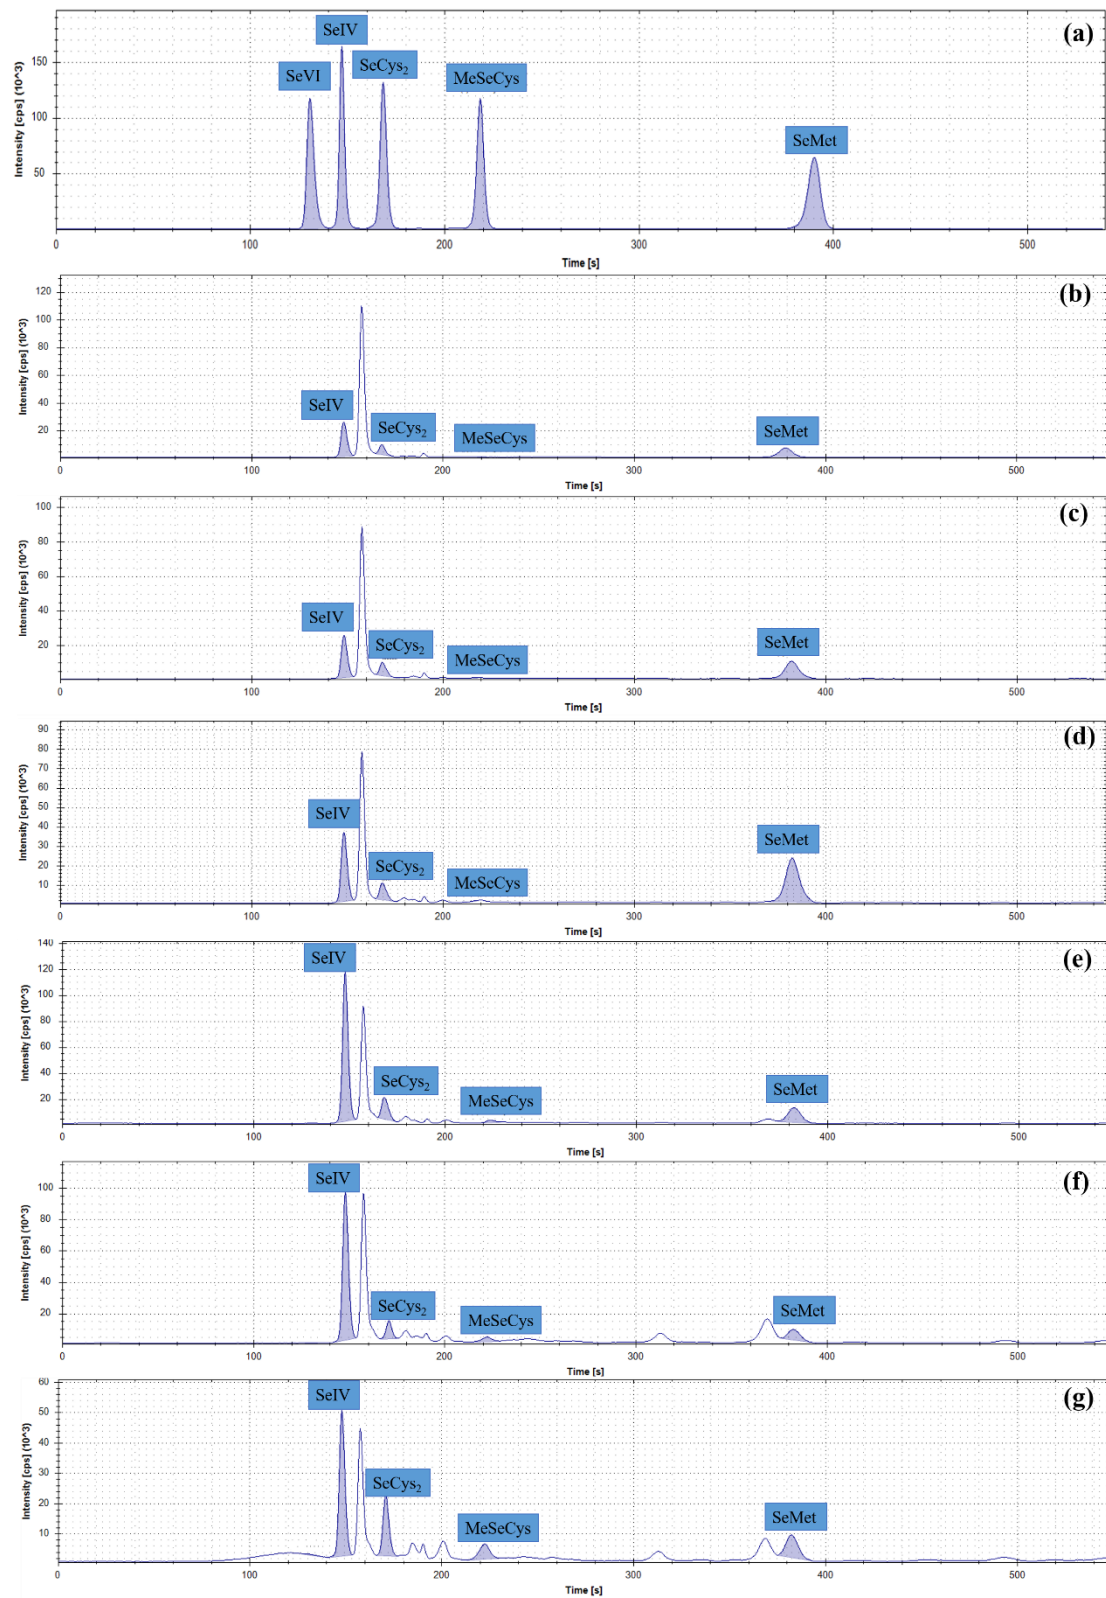

**Fig. S2** HPLC-ICP-MS map of the selenoamino acids. (a) standards; (b-d) *G. lucidum* cultured with 50 ppm Na<sub>2</sub>SeO<sub>3</sub> from the 4<sup>th</sup> to 6<sup>th</sup> day; (e-g) *G. lucidum* cultured with 200 ppm Na<sub>2</sub>SeO<sub>3</sub> from the 4<sup>th</sup> to 6<sup>th</sup> day.
